# Supplementary material for: Cost-effectiveness of physical activity interventions in adolescents: model development and illustration using two exemplar interventions
Source: PubMed Central journal article supplement (PMC6701678; doi:10.1136/bmjopen-2018-027566), 2019-08-18
Supplement: bmjopen-2018-027566supp001.pdf [file bmjopen-2018-027566supp001.pdf]

## Online Supplemental File

### A. Model input parameters

Table S1: Physical activity at baseline and estimates of disease incidence

| Parameters                                                               | Male     |                     |                     |                     | Female   |                      |                     |                     | Distribution | Source |
|--------------------------------------------------------------------------|----------|---------------------|---------------------|---------------------|----------|----------------------|---------------------|---------------------|--------------|--------|
|                                                                          | Inactive | Low                 | Moderate            | High                | Inactive | Low                  | Moderate            | High                |              |        |
| Baseline PA levels                                                       | 12%      | 7%                  | 25%                 | 56%                 | 23%      | 35%                  | 20%                 | 22%                 | Fixed        | [1]    |
| <i>Relative risk (95% CI) estimates used to adjust disease incidence</i> |          |                     |                     |                     |          |                      |                     |                     |              |        |
| CHD                                                                      | 1.0      | 0.87<br>(0.80–0.95) | 0.78<br>(0.74–0.82) | 0.70<br>(0.66–0.75) | 1.0      | 0.87<br>(0.80–0.95)  | 0.78<br>(0.80–0.95) | 0.70<br>(0.80–0.95) | lognormal    | [2]    |
| Stroke                                                                   | 1.0      | 0.85<br>(0.80–0.91) | 0.81<br>(0.74–0.88) | 0.76<br>(0.68–0.85) | 1.0      | 0.85<br>(0.80–0.91)  | 0.81<br>(0.74–0.88) | 0.76<br>(0.68–0.85) | lognormal    | [2]    |
| Heart failure                                                            | 1.0      | 0.85<br>(0.79–0.92) | 0.78<br>(0.75–0.82) | 0.70<br>(0.67–0.73) | 1.0      | 0.85<br>(0.79–0.92)  | 0.78<br>(0.75–0.82) | 0.70<br>(0.67–0.73) | lognormal    | [3]    |
| Type 2 diabetes                                                          | 1.0      | 0.93<br>(0.92–0.95) | 0.75<br>(0.69–0.80) | 0.60<br>(0.51–0.70) | 1.0      | 0.93<br>(0.92–0.95)  | 0.75<br>(0.69–0.80) | 0.60<br>(0.51–0.70) | lognormal    | [4]    |
| Breast cancer                                                            | -        | -                   | -                   | -                   | 1.0      | 0.97<br>(0.94–0.998) | 0.94<br>(0.90–0.98) | 0.86<br>(0.83–0.90) | lognormal    | [5]    |
| Colorectal cancer                                                        | 1.0      | 0.90<br>(0.85–0.95) | 0.83<br>(0.77–0.97) | 0.79<br>(0.74–0.85) | 1.0      | 0.90<br>(0.85–0.95)  | 0.83<br>(0.77–0.97) | 0.79<br>(0.74–0.85) | lognormal    | [5]    |

| Parameters                     | Male     |        |          |        | Female   |        |          |        | Distribution | Source |
|--------------------------------|----------|--------|----------|--------|----------|--------|----------|--------|--------------|--------|
|                                | Inactive | Low    | Moderate | High   | Inactive | Low    | Moderate | High   |              |        |
| <b>CHD incidence</b>           |          |        |          |        |          |        |          |        |              | [6]    |
| <35                            | <0.01%   | <0.01% | <0.01%   | <0.01% | <0.01%   | <0.01% | <0.01%   | <0.01% | beta         |        |
| 35-44                          | 0.01%    | 0.00%  | <0.01%   | <0.01% | <0.01%   | <0.01% | <0.01%   | <0.01% | beta         |        |
| 45-54                          | 0.10%    | 0.09%  | 0.08%    | 0.07%  | 0.02%    | 0.01%  | 0.01%    | 0.01%  | beta         |        |
| 55-64                          | 0.41%    | 0.36%  | 0.32%    | 0.29%  | 0.11%    | 0.10%  | 0.09%    | 0.08%  | beta         |        |
| 65-74                          | 1.08%    | 0.94%  | 0.84%    | 0.76%  | 0.44%    | 0.38%  | 0.34%    | 0.31%  | beta         |        |
| 75+                            | 1.67%    | 1.45%  | 1.30%    | 1.17%  | 0.67%    | 0.59%  | 0.53%    | 0.47%  | beta         |        |
| <b>Stroke incidence</b>        |          |        |          |        |          |        |          |        |              | [7]    |
| <35                            | <0.01%   | <0.01% | <0.01%   | <0.01% | <0.01%   | <0.01% | <0.01%   | <0.01% | beta         |        |
| 35-44                          | <0.01%   | <0.01% | <0.01%   | <0.01% | 0.01%    | 0.01%  | 0.01%    | 0.01%  | beta         |        |
| 45-54                          | 0.01%    | 0.01%  | <0.01%   | <0.01% | 0.01%    | 0.01%  | 0.01%    | 0.01%  | beta         |        |
| 55-64                          | 0.03%    | 0.03%  | 0.03%    | 0.02%  | 0.02%    | 0.02%  | 0.02%    | 0.02%  | beta         |        |
| 65-74                          | 0.08%    | 0.07%  | 0.07%    | 0.06%  | 0.05%    | 0.05%  | 0.04%    | 0.04%  | beta         |        |
| 75-84                          | 0.41%    | 0.35%  | 0.33%    | 0.31%  | 0.28%    | 0.23%  | 0.22%    | 0.21%  | beta         |        |
| <b>Heart failure incidence</b> |          |        |          |        |          |        |          |        |              | [8]    |
| <35                            | <0.01%   | <0.01% | <0.01%   | <0.01% | <0.01%   | <0.01% | <0.01%   | <0.01% | beta         |        |
| 35-44                          | 0.03%    | 0.02%  | 0.02%    | 0.02%  | 0.03%    | 0.02%  | 0.02%    | 0.02%  | beta         |        |
| 45-54                          | 0.04%    | 0.03%  | 0.03%    | 0.03%  | 0.01%    | 0.01%  | 0.01%    | 0.01%  | beta         |        |
| 55-64                          | 0.21%    | 0.18%  | 0.16%    | 0.14%  | 0.08%    | 0.07%  | 0.07%    | 0.06%  | beta         |        |
| 65-74                          | 0.48%    | 0.41%  | 0.37%    | 0.33%  | 0.28%    | 0.24%  | 0.22%    | 0.19%  | beta         |        |
| 75-84                          | 1.14%    | 0.97%  | 0.89%    | 0.80%  | 0.64%    | 0.55%  | 0.50%    | 0.45%  | beta         |        |

| Parameters                       | Male     |       |          |       | Female   |        |          |        | Distribution | Source |
|----------------------------------|----------|-------|----------|-------|----------|--------|----------|--------|--------------|--------|
|                                  | Inactive | Low   | Moderate | High  | Inactive | Low    | Moderate | High   |              |        |
| <b>Type 2 diabetes incidence</b> |          |       |          |       |          |        |          |        |              |        |
|                                  |          |       |          |       |          |        |          |        |              | [9]    |
| <20                              | 0.01%    | 0.01% | 0.01%    | 0.01% | 0.03%    | 0.03%  | 0.03%    | 0.03%  | beta         |        |
| 20–29                            | 0.05%    | 0.04% | 0.04%    | 0.03% | 0.14%    | 0.12%  | 0.11%    | 0.10%  | beta         |        |
| 30–39                            | 0.17%    | 0.15% | 0.13%    | 0.13% | 0.24%    | 0.20%  | 0.18%    | 0.17%  | beta         |        |
| 40–49                            | 0.51%    | 0.44% | 0.38%    | 0.37% | 0.38%    | 0.32%  | 0.28%    | 0.27%  | beta         |        |
| 50–59                            | 0.99%    | 0.85% | 0.74%    | 0.71% | 0.67%    | 0.57%  | 0.50%    | 0.48%  | beta         |        |
| 60–69                            | 1.43%    | 1.23% | 1.07%    | 1.03% | 1.02%    | 0.88%  | 0.76%    | 0.74%  | beta         |        |
| 70–79                            | 1.53%    | 1.31% | 1.15%    | 1.11% | 1.23%    | 1.06%  | 0.92%    | 0.89%  | beta         |        |
| 80–89                            | 1.05%    | 0.90% | 0.79%    | 0.76% | 0.87%    | 0.74%  | 0.65%    | 0.63%  | beta         |        |
| <b>Breast cancer incidence</b>   |          |       |          |       |          |        |          |        |              |        |
|                                  |          |       |          |       |          |        |          |        |              | [10]   |
| <25                              |          |       |          |       | <0.01%   | <0.01% | <0.01%   | <0.01% | beta         |        |
| 25 to 29                         |          |       |          |       | 0.01%    | 0.01%  | 0.01%    | 0.01%  | beta         |        |
| 30 to 34                         |          |       |          |       | 0.03%    | 0.03%  | 0.03%    | 0.02%  | beta         |        |
| 35 to 39                         |          |       |          |       | 0.07%    | 0.07%  | 0.06%    | 0.05%  | beta         |        |
| 40 to 44                         |          |       |          |       | 0.13%    | 0.13%  | 0.12%    | 0.10%  | beta         |        |
| 45 to 49                         |          |       |          |       | 0.24%    | 0.23%  | 0.21%    | 0.19%  | beta         |        |
| 50 to 54                         |          |       |          |       | 0.30%    | 0.29%  | 0.27%    | 0.23%  | beta         |        |
| 55 to 59                         |          |       |          |       | 0.29%    | 0.28%  | 0.27%    | 0.23%  | beta         |        |
| 60 to 64                         |          |       |          |       | 0.38%    | 0.36%  | 0.34%    | 0.29%  | beta         |        |
| 65 to 69                         |          |       |          |       | 0.44%    | 0.42%  | 0.40%    | 0.34%  | beta         |        |
| 70 to 74                         |          |       |          |       | 0.37%    | 0.35%  | 0.33%    | 0.29%  | beta         |        |
| 75 to 79                         |          |       |          |       | 0.40%    | 0.39%  | 0.37%    | 0.32%  | beta         |        |
| 80 to 84                         |          |       |          |       | 0.44%    | 0.42%  | 0.40%    | 0.34%  | beta         |        |

| Parameters                         | Male     |        |          |        | Female   |        |          |        | Distribution | Source |
|------------------------------------|----------|--------|----------|--------|----------|--------|----------|--------|--------------|--------|
|                                    | Inactive | Low    | Moderate | High   | Inactive | Low    | Moderate | High   |              |        |
| <b>Colorectal cancer incidence</b> |          |        |          |        |          |        |          |        |              |        |
|                                    |          |        |          |        |          |        |          |        |              | [11]   |
| <30                                | <0.01%   | <0.01% | <0.01%   | <0.01% | <0.01%   | <0.01% | <0.01%   | <0.01% | <0.01%       | beta   |
| 30 to 34                           | 0.01%    | 0.01%  | 0.01%    | 0.01%  | 0.01%    | 0.01%  | 0.01%    | 0.01%  | 0.01%        | beta   |
| 35 to 39                           | 0.01%    | 0.01%  | 0.01%    | 0.01%  | 0.01%    | 0.01%  | 0.01%    | 0.01%  | 0.01%        | beta   |
| 40 to 44                           | 0.01%    | 0.01%  | 0.01%    | 0.01%  | 0.01%    | 0.01%  | 0.01%    | 0.01%  | 0.01%        | beta   |
| 45 to 49                           | 0.03%    | 0.03%  | 0.02%    | 0.02%  | 0.02%    | 0.02%  | 0.02%    | 0.02%  | 0.02%        | beta   |
| 50 to 54                           | 0.06%    | 0.05%  | 0.05%    | 0.05%  | 0.04%    | 0.04%  | 0.04%    | 0.04%  | 0.03%        | beta   |
| 55 to 59                           | 0.10%    | 0.09%  | 0.08%    | 0.08%  | 0.07%    | 0.06%  | 0.06%    | 0.06%  | 0.06%        | beta   |
| 60 to 64                           | 0.19%    | 0.17%  | 0.15%    | 0.15%  | 0.11%    | 0.10%  | 0.09%    | 0.09%  | 0.09%        | beta   |
| 65 to 69                           | 0.26%    | 0.23%  | 0.21%    | 0.20%  | 0.15%    | 0.13%  | 0.12%    | 0.12%  | 0.12%        | beta   |
| 70 to 74                           | 0.37%    | 0.34%  | 0.31%    | 0.29%  | 0.22%    | 0.20%  | 0.18%    | 0.17%  | 0.17%        | beta   |
| 75 to 79                           | 0.44%    | 0.40%  | 0.37%    | 0.35%  | 0.26%    | 0.24%  | 0.22%    | 0.21%  | 0.21%        | beta   |
| 80 to 84                           | 0.54%    | 0.49%  | 0.45%    | 0.43%  | 0.34%    | 0.31%  | 0.28%    | 0.27%  | 0.27%        | beta   |

Inactive: <30; Low: 30-149; Moderate: 150-420 and High: ≥421 MVPA min per week

Table S2: Estimates of mortality parameters

| Parameter                                                | Value     |         |             |           | Distribution | Source |
|----------------------------------------------------------|-----------|---------|-------------|-----------|--------------|--------|
|                                                          | Male Mean | Male SE | Female mean | Female SE |              |        |
| CHD case fatality rate                                   |           |         |             |           |              | [6]    |
| <54 years                                                | 0.129     | 0.013   | 0.1245      | 0.0125    | beta         |        |
| 55-64 years                                              | 0.132     | 0.013   | 0.1597      | 0.0160    | beta         |        |
| 65-74 years                                              | 0.177     | 0.018   | 0.2235      | 0.0224    | beta         |        |
| 75-84 years                                              | 0.244     | 0.024   | 0.3009      | 0.0301    | beta         |        |
| 85+ years                                                | 0.315     | 0.032   | 0.3668      | 0.0367    | beta         |        |
| Stroke case fatality rate                                | 0.1730    | 0.0152  | 0.1730      | 0.0152    | beta         | [12]   |
| Heart failure case fatality rate                         |           |         |             |           |              | [13]   |
| <35 years                                                | 0.0000    | 0.0000  | 0.0000      | 0.0000    | beta         |        |
| 35-55 years                                              | 0.0989    | 0.0050  | 0.0306      | 0.0001    | beta         |        |
| 55-64 years                                              | 0.1253    | 0.0037  | 0.1094      | 0.0001    | beta         |        |
| 65-74 years                                              | 0.1666    | 0.0028  | 0.1197      | 0.0001    | beta         |        |
| 75-84 years                                              | 0.1989    | 0.0027  | 0.1262      | 0.0001    | beta         |        |
| 85+ years                                                | 0.2279    | 0.0041  | 0.1240      | 0.0001    | beta         |        |
| Death rate after 1 <sup>st</sup> nonfatal CHD            |           |         |             |           |              | [14]   |
| <45 years                                                | 0.0130    | 0.0020  | 0.0130      | 0.0050    | beta         |        |
| 45-54 years                                              | 0.0170    | 0.0010  | 0.0260      | 0.0030    | beta         |        |
| 55-64 years                                              | 0.0380    | 0.0020  | 0.0350      | 0.0020    | beta         |        |
| 65-74 years                                              | 0.0830    | 0.0020  | 0.0820      | 0.0030    | beta         |        |
| 75-84 years                                              | 0.1430    | 0.0040  | 0.1590      | 0.0040    | beta         |        |
| 85+ years                                                | 0.2620    | 0.0110  | 0.2660      | 0.0080    | beta         |        |
| SMR for patients after a 1 <sup>st</sup> nonfatal stroke | 2.40      | 0.08    | 2.21        | 0.10      | Lognormal    | [15]   |
| Death rate after 1 <sup>st</sup> nonfatal heart failure  |           |         |             |           |              | [13]   |
| <55 years                                                | 0.0306    | 0.0001  | 0.0306      | 0.0001    | beta         |        |
| 55-64 years                                              | 0.1094    | 0.0001  | 0.1094      | 0.0001    | beta         |        |
| 65-74 years                                              | 0.1197    | 0.0001  | 0.1197      | 0.0001    | beta         |        |
| 75-84 years                                              | 0.1262    | 0.0001  | 0.1262      | 0.0001    | beta         |        |
| 85+ years                                                | 0.1240    | 0.0001  | 0.1240      | 0.0001    | beta         |        |
| HR for death among patients with type 2 diabetes         | 1.80      | 0.0269  | 1.80        | 0.0269    | lognormal    | [16]   |
| Breast cancer mortality                                  | –         | –       | 0.0290      | 0.0004    | beta         | [17]   |
| Colorectal cancer mortality                              | 0.1038    | 0.0006  | 0.1035      | 0.0006    | beta         | [17]   |
| Lung cancer mortality                                    | 0.3523    | 0.0004  | 0.3112      | 0.0005    | beta         | [17]   |

HR = Hazard ratio; SMR = Standardised mortality ratio

## B. Model validation results

### 1. Cohort profile

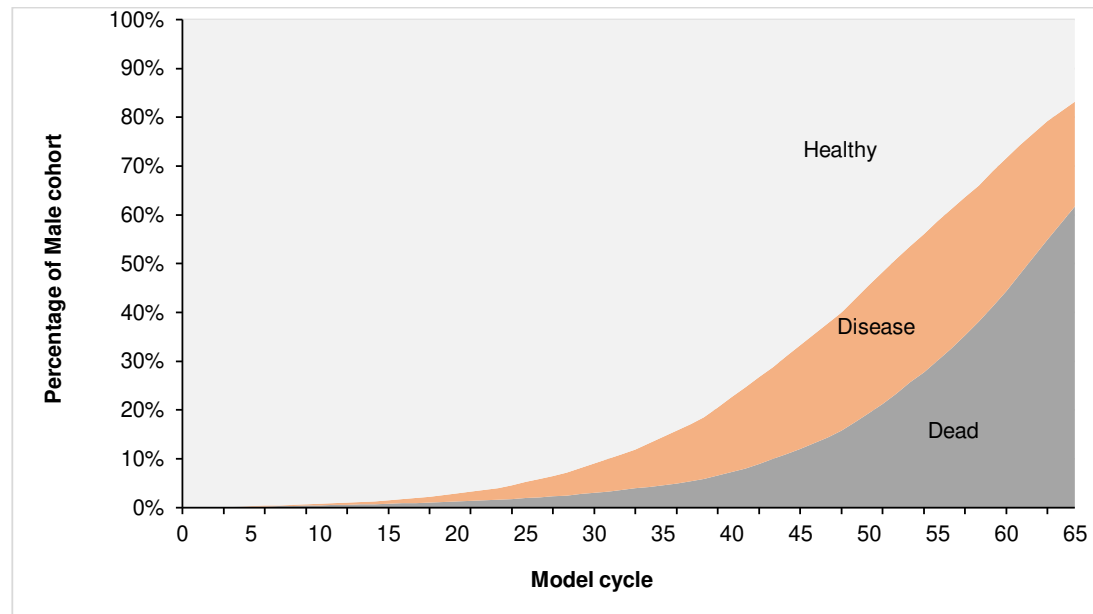

Figure S1: Cohort profile (male)

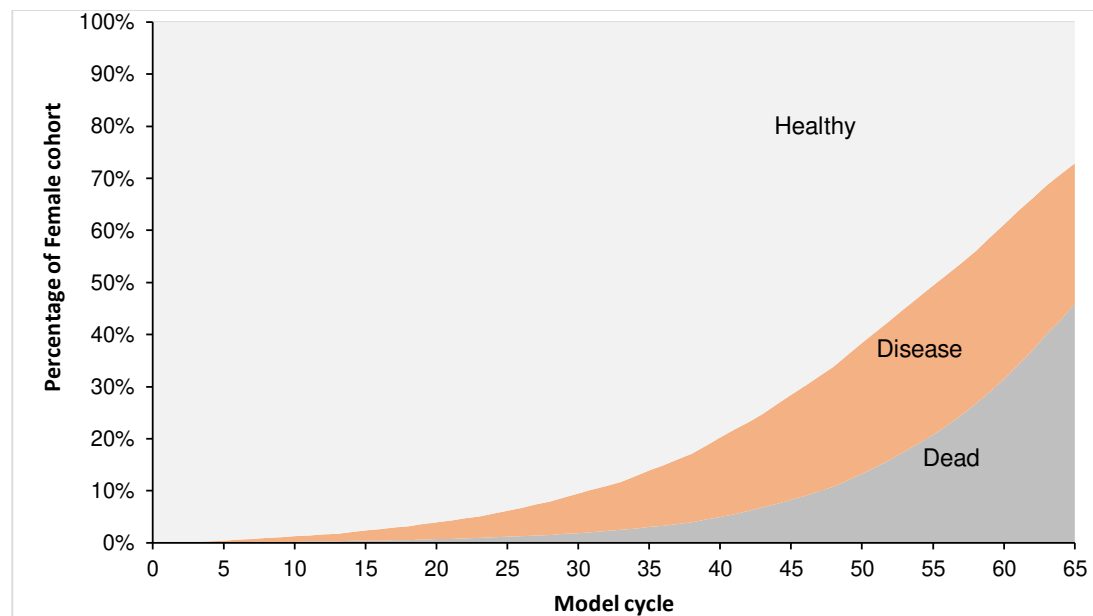

Figure S2: Cohort profile (female)

## 2. Prevalence of physical activity levels by age group and gender

Figure S3: Physical activity levels by age group in Male (HSE 2012 data vs no intervention 'control')

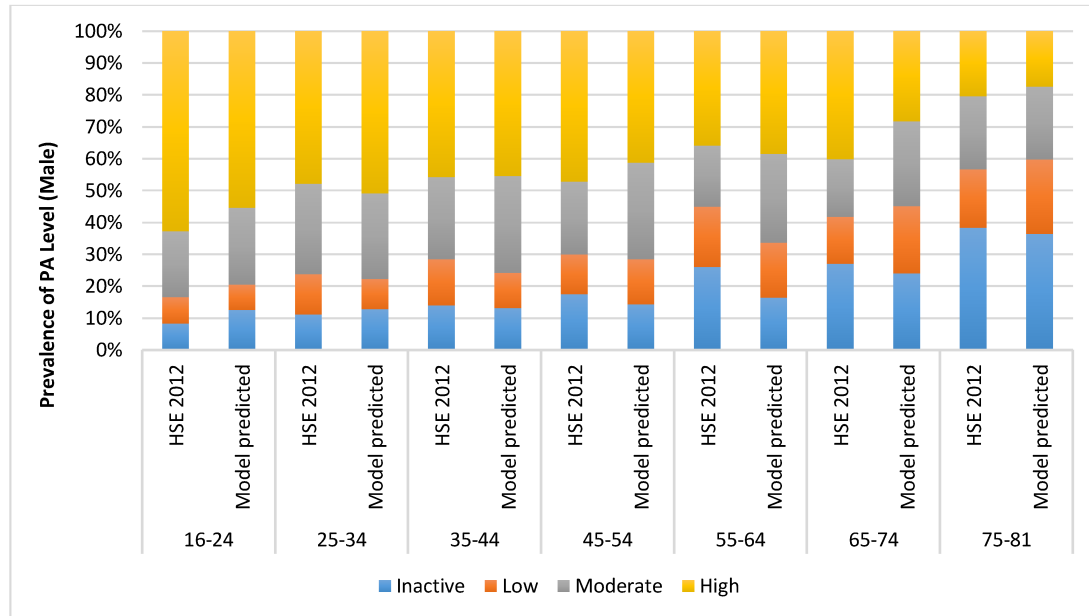

Figure S4: Physical activity levels by age group in Female (HSE 2012 data vs no intervention 'control')

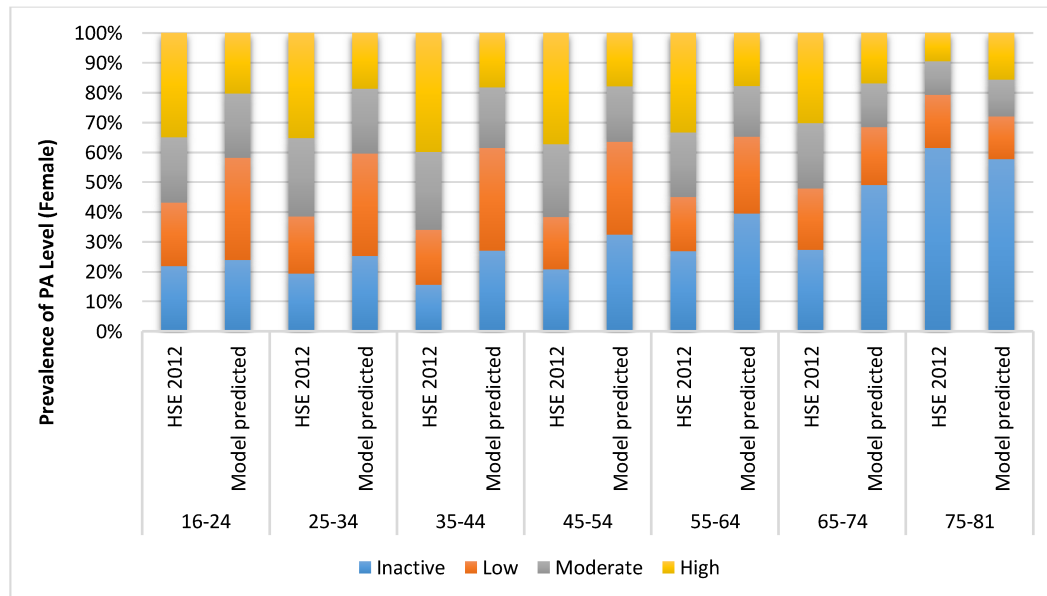

### 3. Risk of disease events

Figure S5: CHD incidence: model predicted versus data informing model parameter by age-group and gender

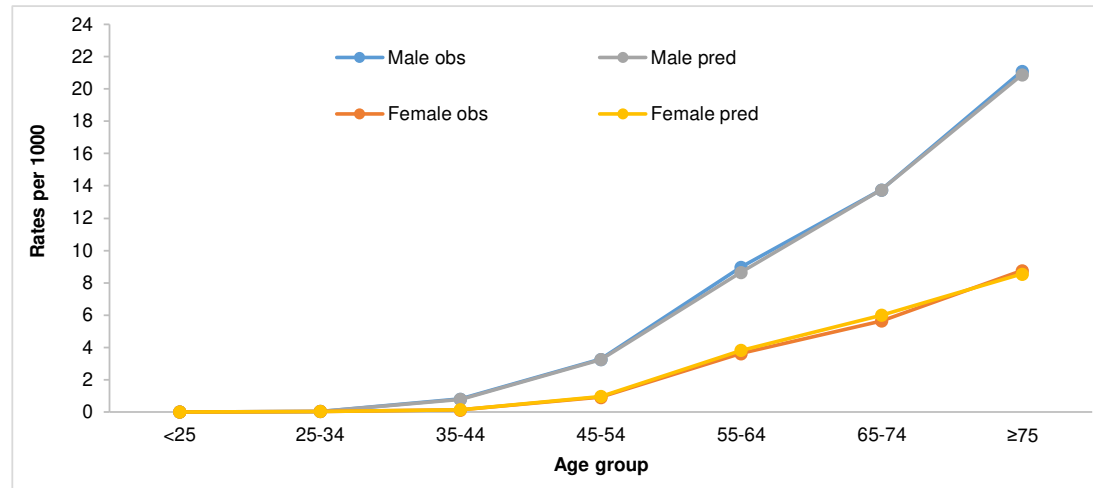

Figure S6: Stroke incidence: model predicted versus data informing model parameter by age-group and gender

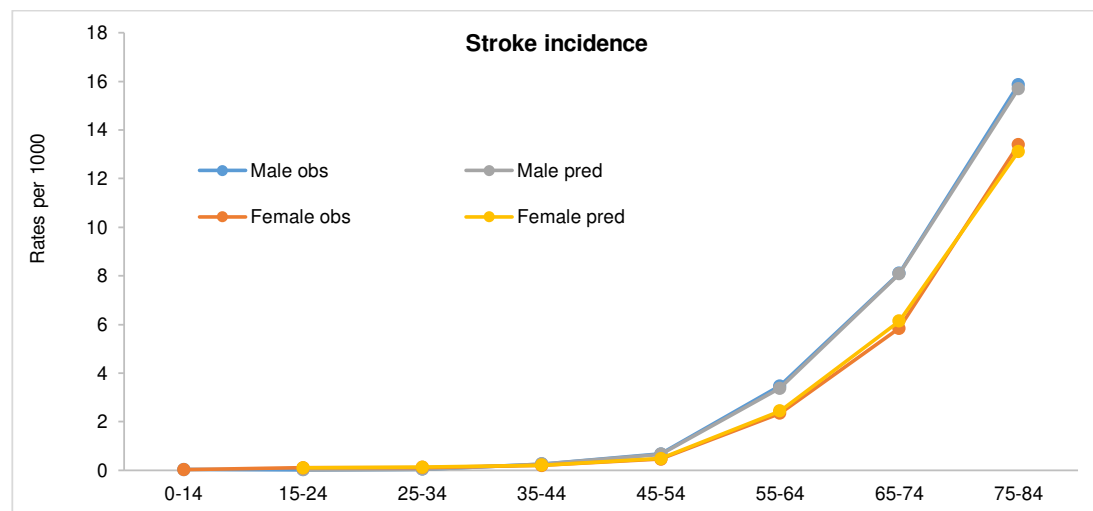



**Figure S7: Heart failure incidence: model predicted versus data informing model parameter by age-group and gender**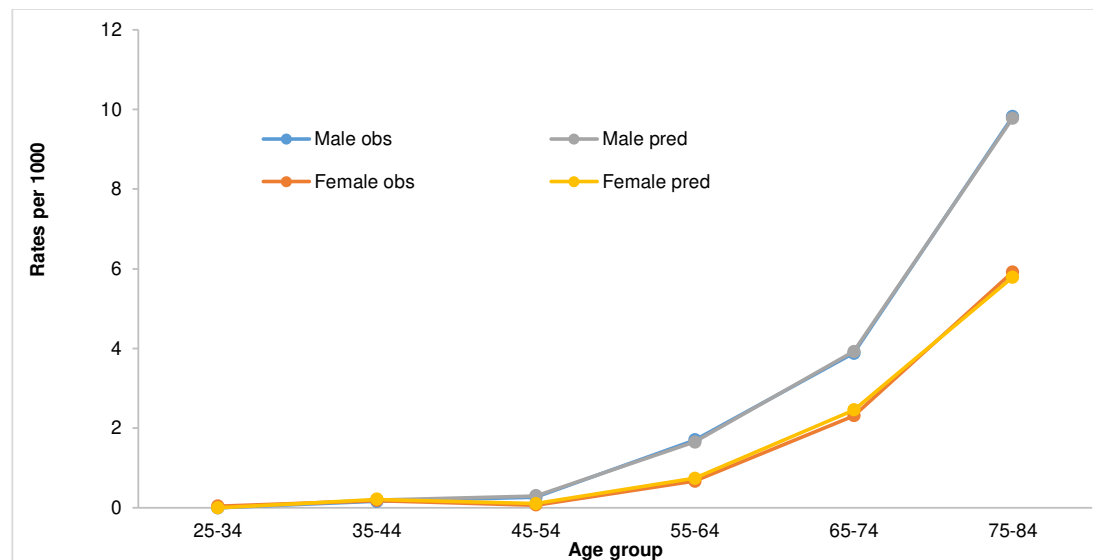**Figure S8: Incidence of type 2 diabetes: model predicted versus data informing model parameter by age-group and gender**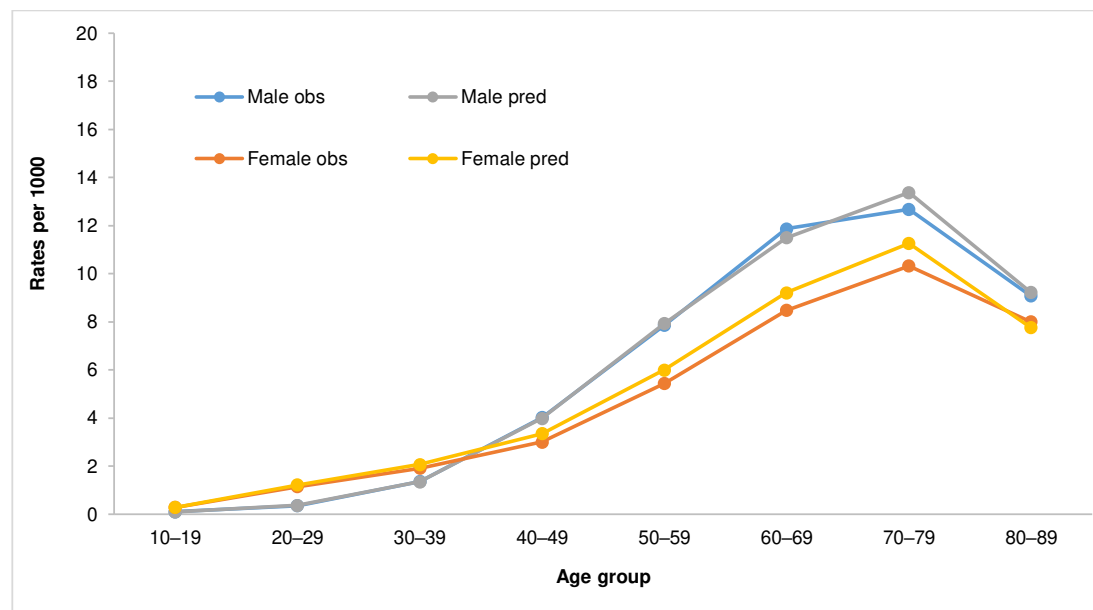

**Figure S9: Breast cancer (female) incidence: model predicted versus data informing model parameter by age-group and gender**

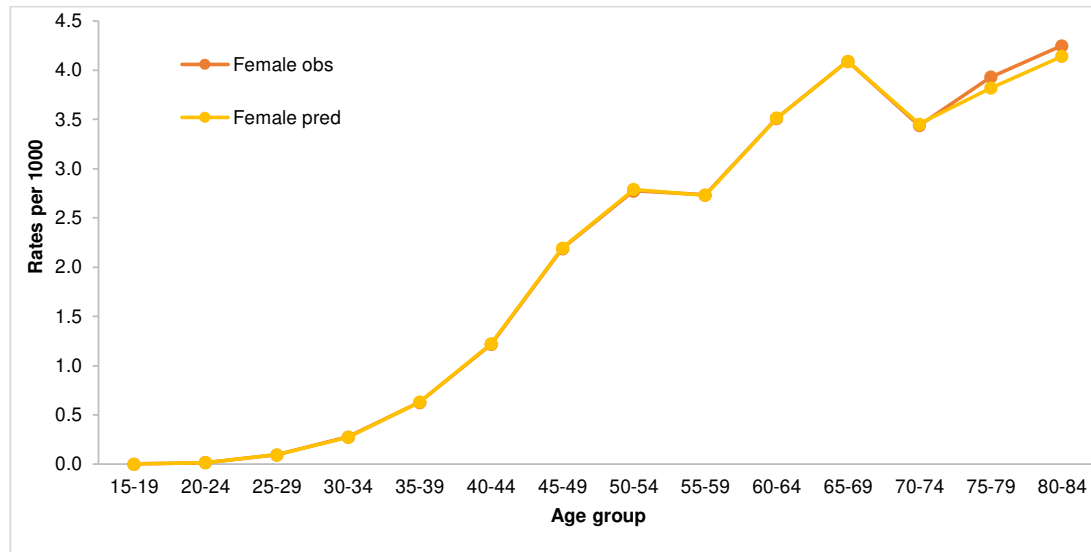

**Figure S10: Colorectal cancer incidence: model predicted versus data informing model parameter by age-group and gender**

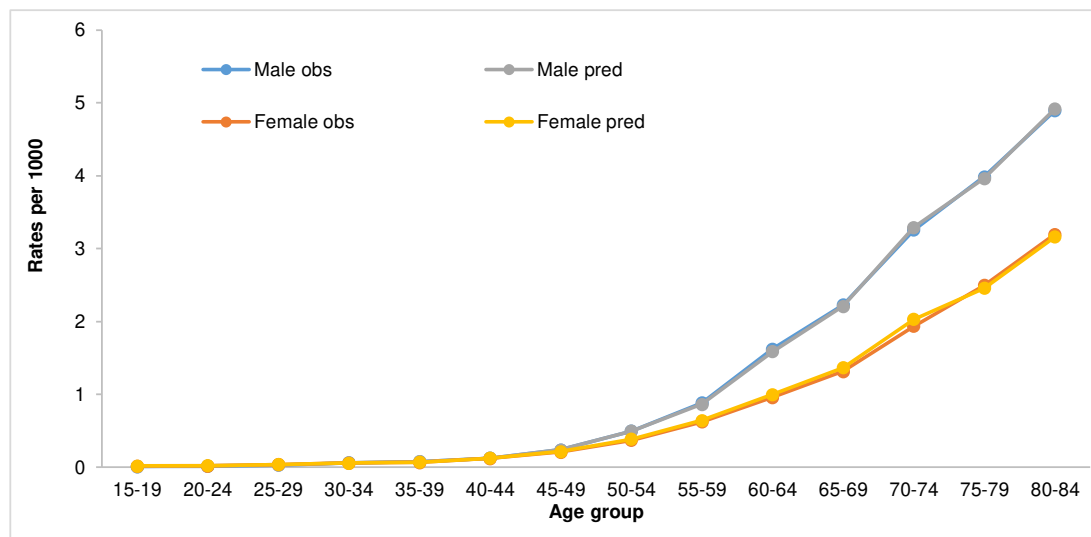

## References

1. Scholes S, Mindell J (2013) *Physical activity in children*. In: Craig R, Mindell J, editors. Health Survey for England 2012.(2013) London: The Health and Social Care Information Centre
2. Wahid A, Manek N, Nichols M *et al*. Quantifying the Association Between Physical Activity and Cardiovascular Disease and Diabetes: A Systematic Review and Meta-Analysis. *J Am Heart Assoc* 2016; 5.
3. Pandey A, Garg S, Khunger M *et al*. Dose-Response Relationship Between Physical Activity and Risk of Heart Failure: A Meta-Analysis. *Circulation* 2015; 132: 1786-1794.
4. Smith AD, Crippa A, Woodcock J *et al*. Physical activity and incident type 2 diabetes mellitus: a systematic review and dose-response meta-analysis of prospective cohort studies. *Diabetologia* 2016.
5. Kyu HH, Bachman VF, Alexander LT *et al*. Physical activity and risk of breast cancer, colon cancer, diabetes, ischemic heart disease, and ischemic stroke events: systematic review and dose-response meta-analysis for the Global Burden of Disease Study 2013. *BMJ* 2016; 354: i3857.
6. Smolina K, Wright FL, Rayner M *et al*. Determinants of the decline in mortality from acute myocardial infarction in England between 2002 and 2010: linked national database study. *BMJ* 2012; 344: d8059.
7. Bamford J, Sandercock P, Dennis M *et al*. A prospective study of acute cerebrovascular disease in the community: the Oxfordshire Community Stroke Project 1981-86. 1. Methodology, demography and incident cases of first-ever stroke. *J Neurol Neurosurg Psychiatry* 1988; 51: 1373-1380.
8. Cowie MR, Wood DA, Coats AJ *et al*. Incidence and aetiology of heart failure; a population-based study. *Eur Heart J* 1999; 20: 421-428.
9. Sharma M, Nazareth I, Petersen I Trends in incidence, prevalence and prescribing in type 2 diabetes mellitus between 2000 and 2013 in primary care: a retrospective cohort study. *BMJ Open* 2016; 6: e010210.
10. Cancer Research UK. Breast cancer statistics. 2016. [accessed 26 October 2016.] Available from: [http://www.cancerresearchuk.org/sites/default/files/cstream-node/cases\\_crude\\_f\\_breast\\_2.xls](http://www.cancerresearchuk.org/sites/default/files/cstream-node/cases_crude_f_breast_2.xls).
11. Cancer Research UK. Bowel cancer incidence. 2016. [accessed 26 October 2016.] Available from: [http://www.cancerresearchuk.org/sites/default/files/cstream-node/cases\\_crude\\_bowel\\_2.xls](http://www.cancerresearchuk.org/sites/default/files/cstream-node/cases_crude_bowel_2.xls).
12. Bamford J, Sandercock P, Dennis M *et al*. A prospective study of acute cerebrovascular disease in the community: the Oxfordshire Community Stroke Project--1981-86. 2. Incidence, case fatality rates and overall outcome at one year of cerebral infarction, primary intracerebral and subarachnoid haemorrhage. *J Neurol Neurosurg Psychiatry* 1990; 53: 16-22.

13. MacIntyre K, Capewell S, Stewart S *et al*. Evidence of improving prognosis in heart failure: trends in case fatality in 66 547 patients hospitalized between 1986 and 1995. *Circulation* 2000; 102: 1126-1131.
14. Turner D, Raftery J, Cooper K *et al*. The CHD challenge: comparing four cost-effectiveness models. *Value Health* 2011; 14: 53-60.
15. Bronnum-Hansen H, Davidsen M, Thorvaldsen P *et al*. Long-term survival and causes of death after stroke. *Stroke* 2001; 32: 2131-2136.
16. Seshasai SR, Kaptoge S, Thompson A *et al*. Diabetes mellitus, fasting glucose, and risk of cause-specific death. *N Engl J Med* 2011; 364: 829-841.
17. Office for National Statistics. Cancer survival in England - adults diagnosed. 2016. [accessed 26 October 2016.] Available from:  
<http://www.ons.gov.uk/file?uri=/peoplepopulationandcommunity/healthandsocialcare/conditionsanddiseases/datasets/cancersurvivalratescancersurvivalinenglandadultsdiagnosed/20102014/finalreferencestablev2.xls>.
